# Supplementary material for: Signalling of Arabidopsis thaliana response to Pieris brassicae eggs shares similarities with PAMP-triggered immunity
Source: PubMed Central journal article supplement — J Exp Bot. 2013 Jan 31;64(2):665–74. doi: 10.1093/jxb/ers362 (PMC3542055; doi:10.1093/jxb/ers362), 2013-01-31
Supplement: supp_ers362_jexbot087841_file001.pdf [file supp_ers362_jexbot087841_file001.pdf]

Signalling of *Arabidopsis* Response to *Pieris brassicae* eggs shares similarities with PAMP-triggered immunity.

Caroline Gouhier-Darimont, André Schmiesing, Christelle Bonnet, Steve Lassueur and Philippe Reymond

### Supplementary Data

**Figure S1.** EDS1 is required for egg-induced expression of SA-signalling genes. Relative expression levels of *ICS1* (At1g74710), *TRX-H5* (At1g45145), *TI* (At1g73260), and *CHIT* (At2g43570) were analysed in *Arabidopsis* by QPCR. Leaves of Col-0 and *eds2-1* plants were treated with 2  $\mu$ l of *Pieris brassicae* egg extract for 24 h before RNA extraction. Expression levels were normalized with respect to the housekeeping gene *EIF4A* (At3g13920). Data bars represent the mean ( $\pm$ SE) of three technical repeats. This experiment was repeated once with similar results.

**Figure S2.** Egg-induced ROS and cell death accumulation in *rbohD* and *rbohF* mutants. Leaves from Col-0, *rbohD*, *rbohF*, and the double mutant *rbohD/F* were treated with 2  $\mu$ l of *P. brassicae* egg extract for 72 h. Histochemical staining of leaves with nitroblue tetrazolium (NBT) to detect  $O_2^-$  (A), 3,3-diaminobenzidine (DAB) to detect  $H_2O_2$  (B), and trypan blue to detect cell death (D) was performed. Control plants (CTL) were not treated and stained after 72 h. For all stainings, leaves from three to five different plants per genotype were used. Panels are close-up photographs of the spotted area. This experiment was repeated twice with similar results. All images were taken with the same magnification. Bar = 1 mm.

**Figure S3.** Quantification of ROS and cell death accumulation in response to egg extract treatment. Different plant genotypes were treated with 2  $\mu$ l of *P. brassicae* egg extract for 72 h. Histochemical staining of leaves with nitroblue tetrazolium (NBT) to detect  $O_2^-$ , 3,3-diaminobenzidine (DAB) to detect  $H_2O_2$ , and trypan blue (TB) to detect cell death was performed. Microscope images were saved as TIFF files and the stained area was measured with ImageJ software. For each genotype, at least 5 leaves were analyzed. Error bars represent SE. Asterisks indicate statistically significant differences compared with Col-0 (Student's *t* test, \* $P$ <0.05, \*\* $P$ <0.01, \*\*\* $P$ <0.001)

**Figure S4.** Purified egg extracts activate the expression of reporter genes. Two  $\mu\text{l}$  of crude egg extract, total egg lipids, and a fraction eluting at 100% MeOH from a solid phase extraction (SPE) column were applied onto leaves of *Arabidopsis* promoter::GUS lines. DMSO (10%) was used as a control. GUS expression was analysed by histochemical staining 72 h after treatment. *PR-1*, *TI* (trypsin inhibitor, At1g73260), and *SAG13* (At2g29350) are egg-inducible genes. All images were taken with the same magnification. Bar = 1 mm

**Figure S5.** Purified egg extracts activate the expression of early PAMP-responsive genes. Plants were treated with two  $\mu\text{l}$  of a fraction eluting at 100% MeOH from a solid phase extraction (SPE) column for 3 and 9 h before RNA extraction. Relative expression levels of *FRK1* (At2g19190), *CYP81F2* (At5g57220), *NHL10* (At2g35980), and *PHI1* (At1g35140) were analysed in *Arabidopsis* by QPCR. Expression levels were normalized with respect to the housekeeping gene *EIF4A* (At3g13920). Data bars represent the mean ( $\pm$ SE) of three technical repeats. This experiment was repeated once with similar results.

**Figure S6.** Egg viability in SA signalling mutants. (A) Hatching rate was monitored five days after *P. brassicae* oviposition on different *Arabidopsis* genotypes. Data represent the mean ( $\pm$ SE) of three independent experiments. The average number of eggs laid on each genotype was  $681 \pm 210$  (Col-0),  $532 \pm 195$  (*eds1-2*), and  $369 \pm 52$  (*nudt7-1*). (B) Thirty freshly hatched *P. brassicae* larvae originating from eggs laid on Col-0, *eds2-1* and *nudt7-1* plants were placed on five-week-old Col-0 plants and larval weight (mean  $\pm$ SE) was measured after 7 days of feeding. This experiment was repeated twice with similar results.

Figure S1

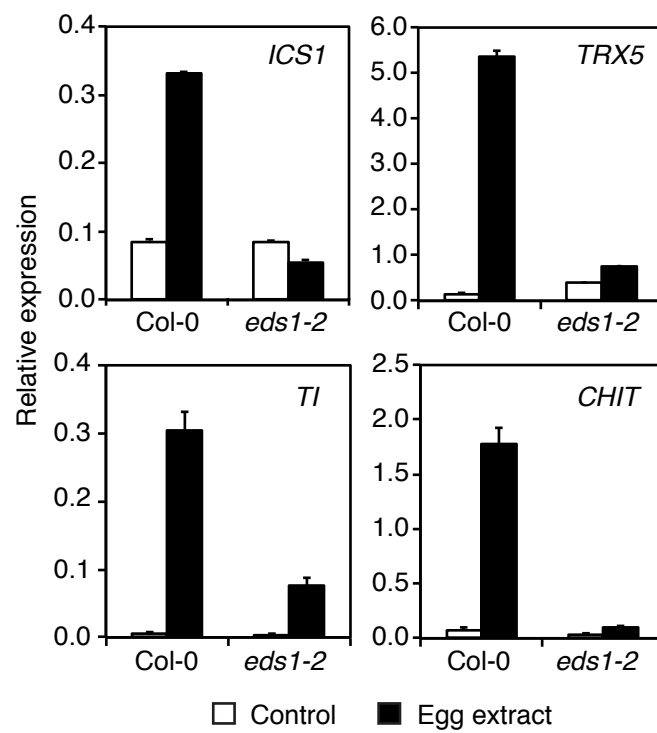

Figure S2

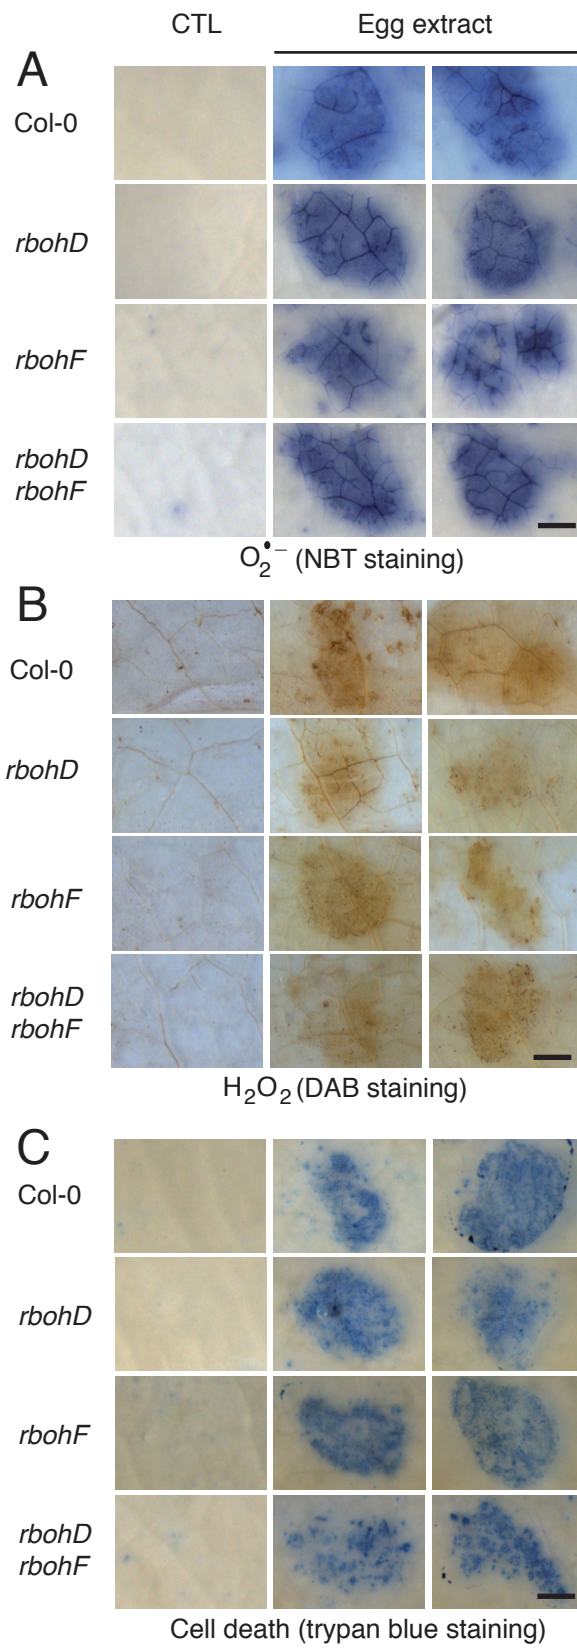

Figure S3

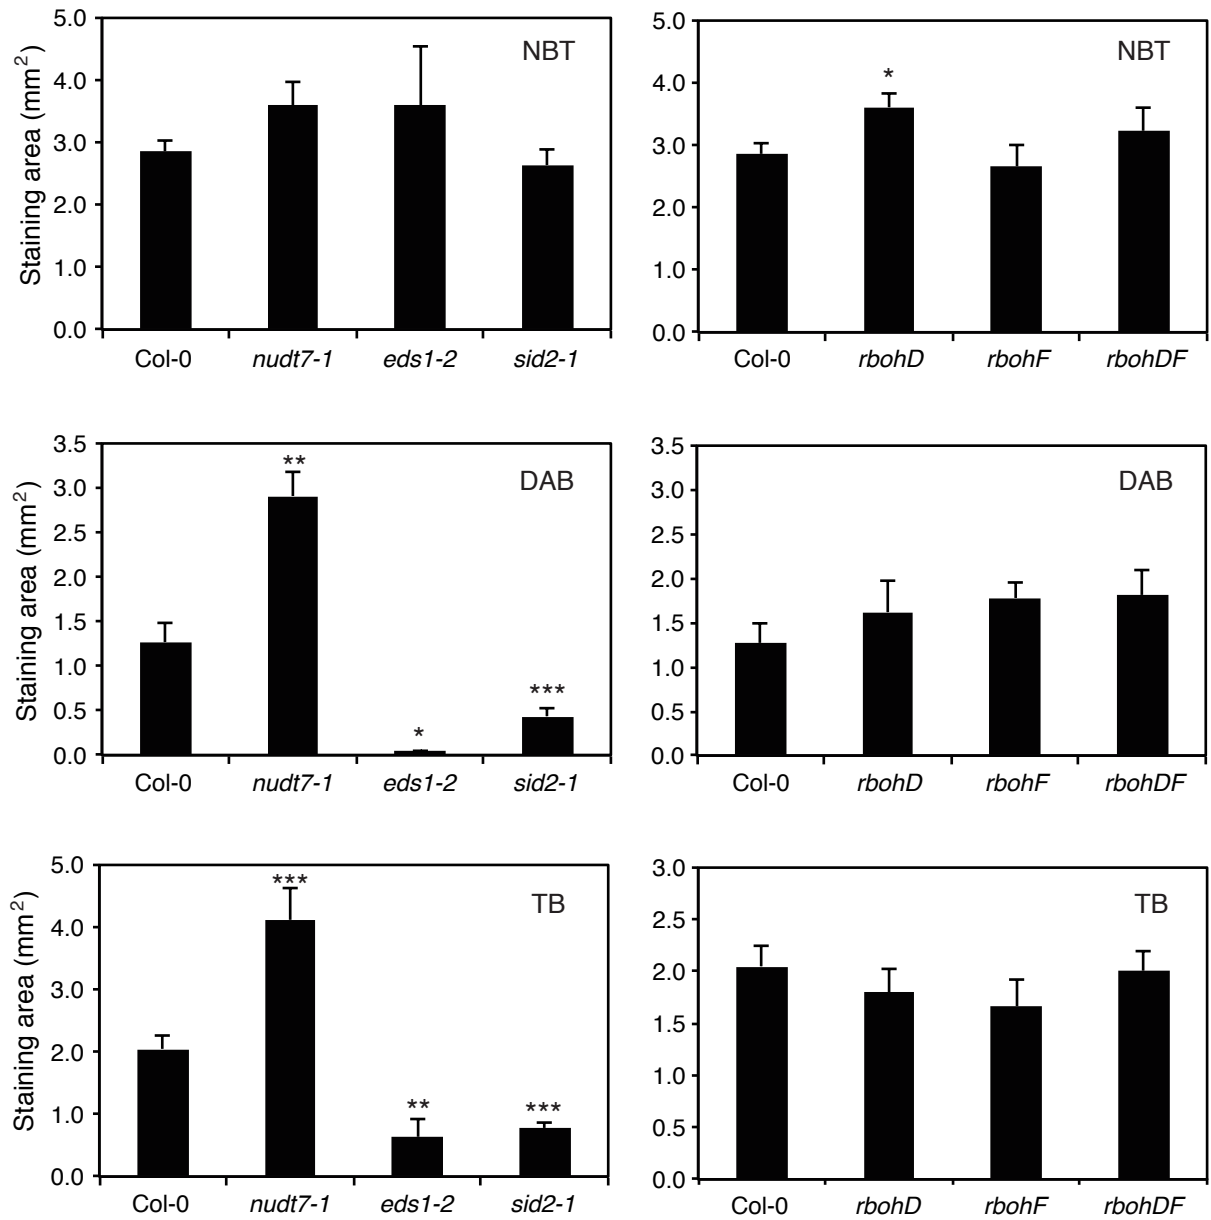

Figure S4

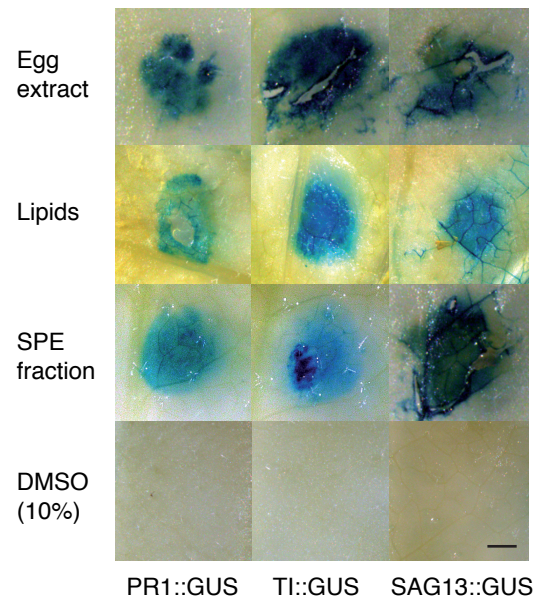

Figure S5

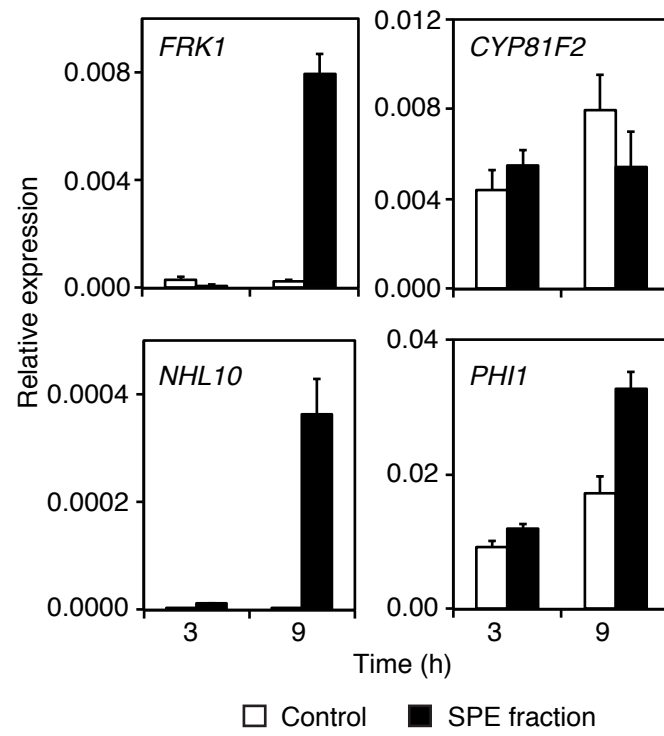

Figure S6

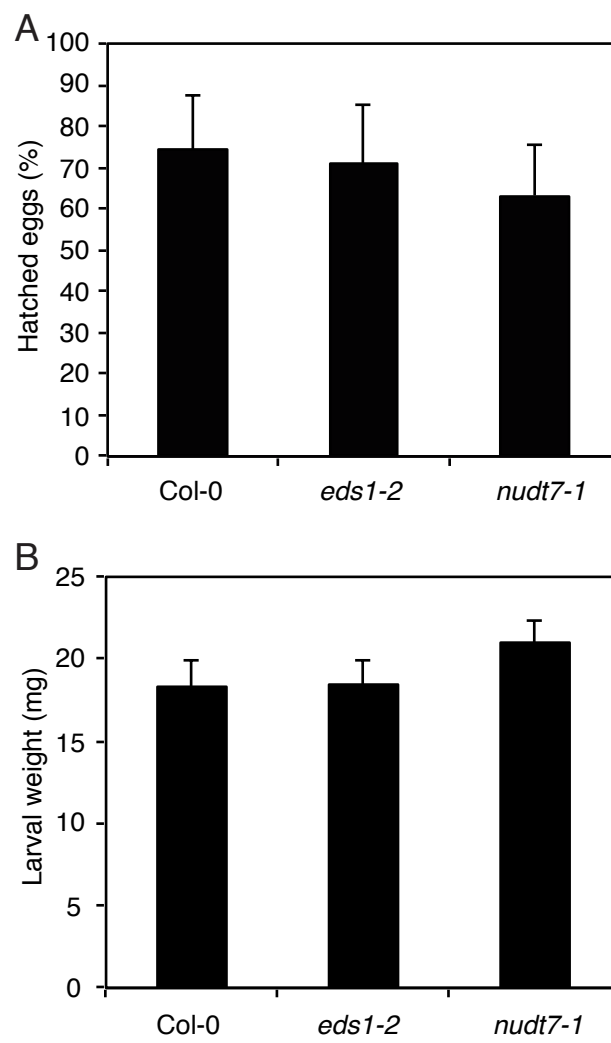



**Table S1.** List of primers used in this study

| Gene      | AGI       | Primer      | Sequence (5' - 3')       |
|-----------|-----------|-------------|--------------------------|
| CHIT      | At2g43570 | CHIT-Fw     | GGAGAGTACTGCGACACAGAGAAA |
|           |           | CHIT-Rev    | GGCAGGAACCTGGTCTTGAGCAA  |
| CYP81F2   | At5g57220 | CYP81F2-Fw  | TATTGTCCGCATGGTCACAG     |
|           |           | CYP81F2-Rev | CTCGCACCACTGTTGTCATT     |
| EIF4A     | At3g13920 | EIF4A-Fw    | CCAGAAGGCACACAGTTTGAT    |
|           |           | EIF4A-Rev   | AGACTGAGCCTGTTGAATCAC    |
| FRK1      | At2g19190 | FRK1-Fw     | TACGGCTCTTGTTGAACACT     |
|           |           | FRK1-Rev    | TCACTATACGCGGTGTCCAT     |
| ICS1      | At1g74710 | SID2c-Fw    | GGACTIONAATTAGGTGTCTGC   |
|           |           | SID2c-Rev   | AAGCCTTGCTTCTTCTGCTG     |
| NHL10     | At2g35980 | NHL10-Fw    | GCTGCTGAACAACCTCTCAA     |
|           |           | NHL10-Rev   | CTACGCCGAGGATGACAATA     |
| PHI1      | At1g35140 | PHI1-Fw     | TGTGTTTGGATGCGAGAACG     |
|           |           | PHI1-Rev    | ATCGGTTACGATTGCACGCT     |
| PR1       | At2g14610 | PR1-Fw      | GTGGGTTAGCGAGAAGGCTA     |
|           |           | PR1-Rev     | ACTTTGGCACATCCGAGTCT     |
| TI        | At1g73260 | TI-Fw       | CCTCGTGGTTGCTGGTCCAAA    |
|           |           | TI-Rev      | CCTCTCACATAGTCTTGGACGAAA |
| TRX-H5    | At1g45145 | TRXh5-Fw    | AGTGATTGCTTGCCATACCC     |
|           |           | TRXh5-Rev   | CTGCAAACACTGGTGCAATG     |
| LecRK-I.8 | At5g60280 | LP          | ACACCACAACCAACAGGTCTC    |
|           |           | RP          | CAGAAGCTGTTTCTCAATCGG    |
